# Supplementary material for: Optimized GIP analogs promote body weight lowering in mice through GIPR agonism not antagonism
Source: PubMed Central journal article supplement — Mol Metab. 2018 Dec 5;20:51–62. doi: 10.1016/j.molmet.2018.12.001 (PMC6358549; doi:10.1016/j.molmet.2018.12.001), 2018-12-05
Supplement: mmc1.pdf [file mmc1.pdf]

|                      |                                                                 |
|----------------------|-----------------------------------------------------------------|
| hGIP                 | YAEGT FISDY SIAMD KIHQQ DFVNW LLAQK GKKND WKHNI TQ-OH           |
| hGIP Aib2            | YXEGT FISDY SIAMD KIHQQ DFVNW LLAQK GKKND WKHNI TQ-OH           |
| hGIP Aib2 Cex*       | YXEGT FISDY SIAMD RIHQQ DFVNW LLAQG PSSGA PPPSK-NH <sub>2</sub> |
| hGIP Aib2 Cex        | YXEGT FISDY SIAMD KIHQQ DFVNW LLAQG PSSGA PPPSK-NH <sub>2</sub> |
| mGIP                 | YAEGT FISDY SIAMD KIRQQ DFVNW LLAQR GKKSD WKHNI TQ-OH           |
| mGIP Aib2            | YXEGT FISDY SIAMD KIRQQ DFVNW LLAQR GKKSD WKHNI TQ-OH           |
| hGIP Aib2 Arg18      | YXEGT FISDY SIAMD KIRQQ DFVNW LLAQK GKKND WKHNI TQ-OH           |
| Acyl GIPR agonist    | YXEGT FISDY SIAMD KIHQQ DFVNW LLAQK GKKND WKHNI TQU-OH          |
| Acyl GIPR antagonist | Ac-T FISDZ SIAMD KIRQQ DFVNW LLAQK GKKND WKHNI TQ-OH            |
| GLP-1 Aib2 Glu16 Cex | HXEGT FTSDV SSYLE EQAAR EFLAW LVRGG PSSGA PPPS-NH <sub>2</sub>  |

X = 2-aminoisobutyric acid

U = Lys(γEγEγE-C16)

Z = Lys(γEγE-C16)
